# Supplementary material for: Zafirlukast Induces VHL- and HIF-2α-Dependent Oxidative Cell Death in 786-O Clear Cell Renal Carcinoma Cells
Source: MDPI journal article supplement (doi:10.3390/ijms23073567), 2022-03-25
Supplement: s1 [file s1]

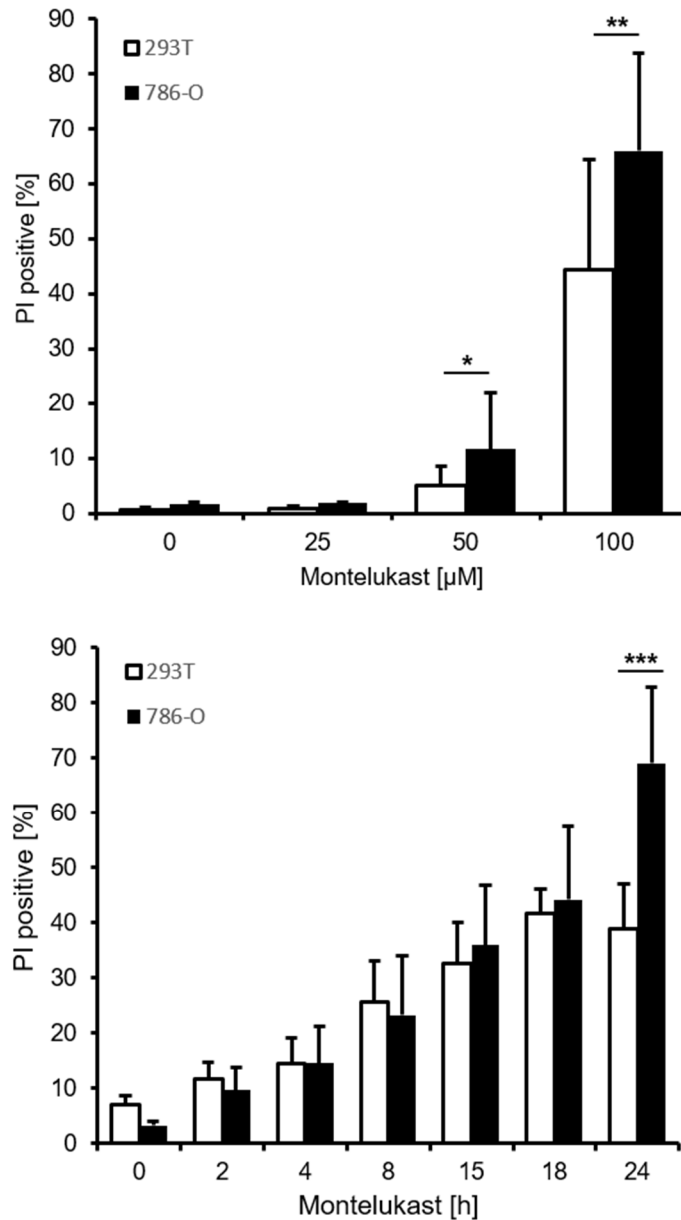

**Figure S1. 786-O RCC cells are sensitive towards montelukast-induced cell death.** 786-O and 293T cells were treated with the indicated concentrations of montelukast for 24 hours (*upper*) and indicated timepoints (100μM montelukast) (*lower*), after which cell death was determined by quantifying PI uptake. Data are presented as percentage of PI-positive cells and mean and SD of three independent experiments performed in triplicate are shown. \* P < 0.05, \*\* P < 0.01, \*\*\* P < 0.001.

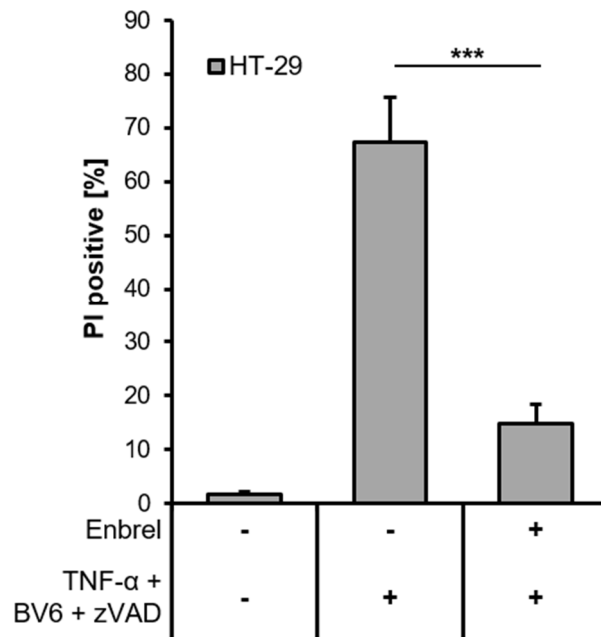

**Figure S2. Enbrel-mediated inhibition of TNF $\alpha$ /BV6/zVAD.fmk-induced necroptosis in HT-29 cells.** HT-29 colon carcinoma cells were pre-treated with 100  $\mu$ g/ml of Etanercept (Enbrel) for 1 h, followed by treatment with 20 ng/ml TNF $\alpha$ , 5  $\mu$ M BV6 and 20  $\mu$ M zVAD.fmk for 24 h, after which cell death was determined by quantifying PI uptake. Data are presented as percentage of PI-positive cells and mean and SD of three independent experiments performed in triplicate are shown. \*\*\* P < 0.001.

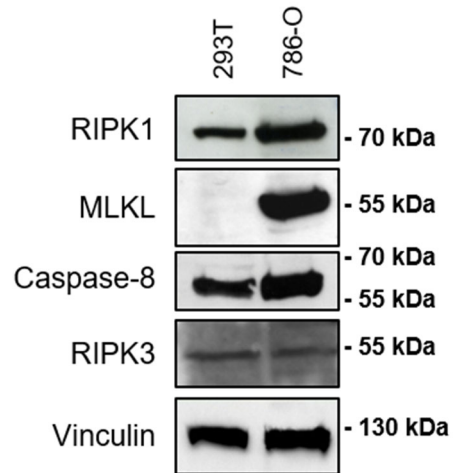

**Figure S3. Expression of necroptotic key proteins in 293T and 786-O cells.**

Western blot analysis of RIPK1, RIPK3, caspase-8 and MLKL in 293T and 786-O cells.

Vinculin served as loading control.

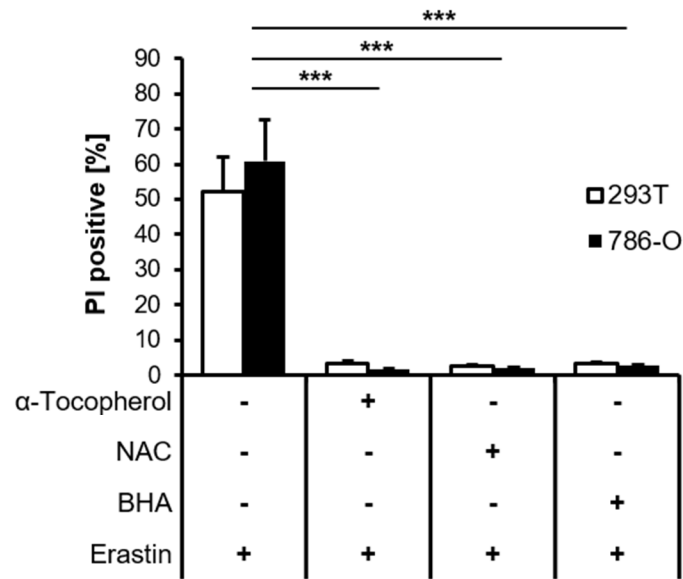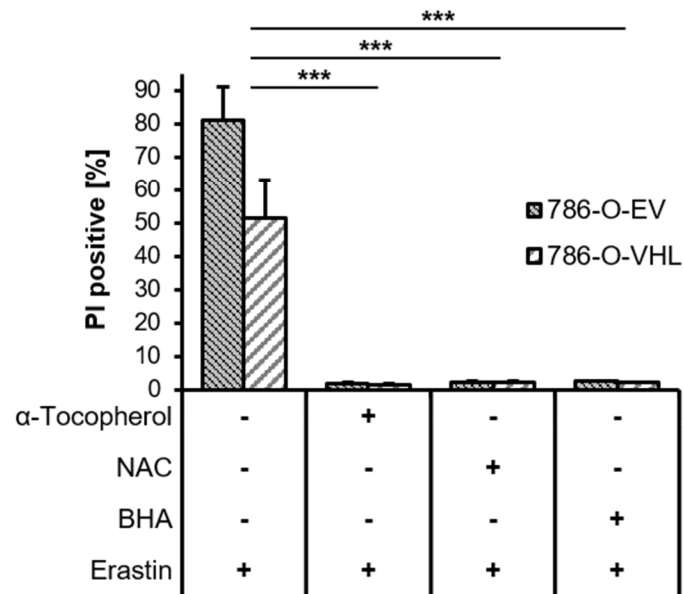

**Figure S4. Antioxidants affect Erastin-induced cell death.** 786-O and 293T (upper) and 786-O-EV and 786-O-VHL (lower) cells were pre-treated with  $\alpha$ -Toc (100  $\mu$ M), NAC (10 mM) and BHA (50  $\mu$ M), followed by treatment with 10  $\mu$ M Erastin for 24 h, after which cell death was determined by quantifying PI uptake. Data are presented as percentage of PI-positive cells and mean and SD of four independent experiments performed in triplicate are shown. \*\*\* P < 0.001.
